# Supplementary material
Source: PubMed Central journal article supplement (PMC9982313)
Supplement: mmc1.pdf [file mmc1.pdf]

## Supplementary Fig. 1. Dose Volume Evaluation 26 Gy in 5 fractions Whole Breast<sup>1,2</sup>

### Dose Volume Evaluation 26 Gy in 5 fractions Whole Breast

| Dose | 95%  | 107%   |
|------|------|--------|
| 26   | 24.7 | 27..82 |

| Dose PTV | Fractions |
|----------|-----------|
| 26Gy     | 5         |

#### EVALUATION OF TARGET- Whole breast

**ENSURE TRUE TARGET COVERAGE IS ADEQUATE BY VISUALLY ASSESSING EACH AXIAL CT SLICE AS STANDARD**

| Volume      | Parameter         | Optimal | Mandatory | Result |
|-------------|-------------------|---------|-----------|--------|
| Breast PTV* | V <sub>95%</sub>  | ≥ 95%   | ≥ 90%     | %      |
|             | V <sub>105%</sub> | ≤ 5%    | ≤ 7%      | %      |
|             | V <sub>107%</sub> |         | ≤ 2%      | %      |
|             | D <sub>max</sub>  |         | ≤ 110%    | %      |

\*A field-based Breast PTV is generated by radiation therapists before any field segments are added. The Breast PTV is not a true PTV but a structure encompassing the 95% isodose line, which is cropped 0.5cm from lungs and skin surface. This is to be used for DVH evaluation.

#### EVALUATION OF OARs(13)

| OAR                          | Parameter        | Optimal Constraint | Mandatory | Result |
|------------------------------|------------------|--------------------|-----------|--------|
| Ipsilateral Lung             | V <sub>30%</sub> | ≤ 15%              | ≤ 17%     | %      |
| Heart                        | V <sub>5%</sub>  |                    | ≤ 25%     | %      |
|                              | V <sub>25%</sub> |                    | ≤ 5%      | %      |
| If Electronic device present |                  |                    | D max     | Gy     |

1. FAST-Forward Protocol Version 3.0: 08/07/2015
2. Planning Pack for the FAST-Forward Trial. Version 3

Accessed March 2020

Available at: [https://www.icr.ac.uk/our-research/centres-and-collaborations/centres-at-the-icr/clinical-trials-and-statistics-unit/clinical-trials/fast\\_forward\\_page](https://www.icr.ac.uk/our-research/centres-and-collaborations/centres-at-the-icr/clinical-trials-and-statistics-unit/clinical-trials/fast_forward_page)

**Supplementary Table 1: Radiation Dermatitis Scoring Criteria for Adverse Event (CTCAE) v.5**

|                      | None | 1                                              | 2                                                                               | 3                                                                                                 | 4                                                                                                                                  |
|----------------------|------|------------------------------------------------|---------------------------------------------------------------------------------|---------------------------------------------------------------------------------------------------|------------------------------------------------------------------------------------------------------------------------------------|
| Radiation Dermatitis |      | 1a: Faint Erythema<br><br>1b: Dry desquamation | 2a: Moderate to brisk erythema, mostly in skin folds<br><br>2b: Moderate oedema | 3a Confluent moist desquamation, other than skin folds<br><br>3b Bleeding induced by minor trauma | 4a Skin necrosis or ulceration of full thickness dermis;<br>4b Spontaneous bleeding from involved site;<br>4c Skin graft indicated |

## Supplementary Figure 2: Virtual Consultation

| ACUTE TOXICITY ASSESSMENT                                                                     |           |   |   |   |   |     |                                                             |
|-----------------------------------------------------------------------------------------------|-----------|---|---|---|---|-----|-------------------------------------------------------------|
| Date Last Treatment :                                                                         |           |   |   |   |   |     |                                                             |
| Patient's Assessment: Questions are in relation to how their skin has been in the last 7 days |           |   |   |   |   |     |                                                             |
| Weeks post treatment:                                                                         | Base line | 1 | 2 | 3 | 4 |     |                                                             |
| Today's Date:                                                                                 |           |   |   |   |   |     |                                                             |
| Has your skin changed colour?                                                                 |           |   |   |   |   | No  | Grade 0                                                     |
|                                                                                               |           |   |   |   |   | Yes | Grade 1a = Faint red / pink<br>Grade 2a = Bright red        |
| Is your skin dry, flaky, or scaly?                                                            |           |   |   |   |   | Yes | Grade 1b                                                    |
| Are there moist or wet areas of skin breakdown?                                               |           |   |   |   |   | Yes | Grade 2b = confined to skin folds<br>Grade 3a = other areas |
| Does your skin bleed?                                                                         |           |   |   |   |   | Yes | Grade 3b = minor trauma<br>Grade 4a = spontaneously         |
| Is your breast swollen                                                                        |           |   |   |   |   | Yes | At least grade 2c                                           |
| Are there areas of deep aggressive ulceration?<br>Are there areas of muscle on show?          |           |   |   |   |   | Yes | Grade 4b                                                    |

**Supplementary Table 2 Radiation Quality Assurance- Analysis of radiation planning objectives for the 135 breast patients who underwent ultrafractionation at our Radiation Network (March – August 2020)**

|        | Breast PTV V95% | Breast PTV DMAX | Breast PTV V105% | Body V105% | Body V105% (cc) | Heart V5% | Heart V25% | i/l lung V30% |
|--------|-----------------|-----------------|------------------|------------|-----------------|-----------|------------|---------------|
| Median | 96.3            | 105.5           | 0.1              | 0          | 0.2             | 2.1       | 0          | 11.5          |
| Min    | 90.1            | 104             | 0                | 0          | 0               | 0         | 0          | 2.4           |
| Max    | 99.8            | 109.2           | 4.8              | 0.2        | 109.2           | 24.8      | 5          | 17            |
